# Supplementary material for: Genetic evidence for functions of Chloroplast CA in Pyropia yezoensis: decreased CCM but increased starch accumulation
Source: Research Square preprint supplement (doi:10.21203/rs.3.rs-3227027/v1), 2023-08-08
Supplement: Supplementary file 1 [file c4a0226b921bf48d00bb3776.pdf]

Table 1

The concentration of DIC and bicarbonate in medium before and after cultivation

| Sample | 2mM        |                                  | 8mM        |                                  |
|--------|------------|----------------------------------|------------|----------------------------------|
|        | [DIC]      | [HCO <sub>3</sub> <sup>-</sup> ] | [DIC]      | [HCO <sub>3</sub> <sup>-</sup> ] |
| WT     | 2.47±0.068 | 1.27±0.028                       | 3.15±0.143 | 1.43±0.037                       |
| cali-1 | 2.42±0.012 | 1.53±0.013                       | 7.24±0.014 | 3.31±0.079                       |
| cali-2 | 2.30±0.035 | 1.42±0.016                       | 7.00±0.116 | 2.95±0.176                       |
| cali-6 | 2.38±0.070 | 1.42±0.043                       | 3.42±0.041 | 1.83±0.069                       |
